# Supplementary material for: Construction of a Recombinant Porcine Epidemic Diarrhea Virus Encoding Nanoluciferase for High-Throughput Screening of Natural Antiviral Products
Source: MDPI journal article supplement (doi:10.3390/v13091866), 2021-09-18
Supplement: s1 [file s1]

**Table S1. Primers used for viral genome sequencing in this study.**

| Primer | Location <sup>a</sup> | Sequence (5'-3')          |
|--------|-----------------------|---------------------------|
| 1F     | 1-24                  | ACTTAAAGAGATTTTCTATCTATG  |
| 1R     | 1232-1255             | CACCTTAAGAATTCGCCAGAATGC  |
| 2F     | 1062-1083             | ATTGGACTTCCTATGTCTCCAC    |
| 2R     | 2124-2145             | ACACAAAGCTCTGCAACACTAG    |
| 3F     | 1986-2008             | TCTTCGAGAGTGACGGGTTTAC    |
| 3R     | 3137-3161             | CCTCAATGGCAACGTTGATATACTC |
| 4F     | 2973-2996             | GTGGTGGTGATGTCAAATTCTCTG  |
| 4R     | 4198-4220             | CAAGGTCATAAAATCTCCTTGG    |
| 5F     | 4049-4072             | GGTTATGGTCGTCATCAGATAAAG  |
| 5R     | 5229-5253             | GTAACAGTGGATTCTACTTTAACAG |
| 6F     | 5053-5075             | CAAGGTATCTAAGCTTAAAGGCA   |
| 6R     | 6251-6273             | GGTACACCAGCTAGAACTTTAAC   |
| 7F     | 6059-6082             | CAGACGGCTGTTGTGATTAAAGAC  |
| 7R     | 7266-7290             | GCATTCTTAACCTGATTACATTGG  |
| 8F     | 7089-7111             | GTCCTGCCACTATTCTTATTGAC   |
| 8R     | 8255-8277             | CAAGCCGAATTAAAAATGCAAGC   |
| 9F     | 8103-8125             | CTATAGTCGTTGGTGTATCAGAC   |
| 9R     | 9268-9290             | AGCCAGCCTGTAGAGTTGAATTG   |
| 10F    | 9107-9128             | CTGCGTCAGTATGCTAGTACTT    |
| 10R    | 10275-10298           | CAGGATTACCCAAAAGAACTTAG   |
| 11F    | 10120-10141           | CTATACCTCGTTGACAGATGAG    |
| 11R    | 11314-11336           | GGCGTGCAATTTTCATAAATGACA  |
| 12F    | 11151-11172           | TGTGTAATGACCCAGAAAAAGC    |
| 12R    | 12319-12341           | CATTACCAGAACCATTGGCCAAC   |
| 13F    | 12162-12182           | ACATAGGTGCCACTGTACGCT     |
| 13R    | 13246-13268           | GGTATACCCATTCCCTTGATGCT   |
| 14F    | 13037-13060           | CCTACTTCAATAATAAAGTCTGGT  |
| 14R    | 14273-14294           | TGATGATACTGCCGAGTAGTCA    |
| 15F    | 14088-14110           | TCCTTTGAACAAGTTTGGTAAAG   |
| 15R    | 15300-15323           | CAGAATTAGCAGTAGAATCTTCC   |
| 16F    | 15141-15163           | GCTTGAACGTTATGTGTCATTGG   |
| 16R    | 16308-16328           | CAAAGTGAATCGACCGCTGCA     |
| 17F    | 16146-16167           | CATACCTGAAGCTTATTCTAGC    |
| 17R    | 17307-17331           | CGAGATAACATGCTCATATTTAATG |
| 18F    | 17142-17164           | GCTTAAATTGTCTGATTTCAGG    |
| 18R    | 18287-18309           | CACATTACAATTCCAAAACAAGC   |
| 19F    | 18121-18143           | CTTAAGTTATACAATCCGAAAGC   |
| 19R    | 19294-19316           | ATGTCGCTACGAGGGCTAAAATC   |
| 20F    | 19144-19166           | ACTGGCATAAAGTTAACTTATGG   |
| 20R    | 20290-20312           | GTACAGAACATTGTCCAATACTC   |

<sup>a</sup> Location corresponds to position within the genome of PEDV YN150.

**Continued Table S1**

| <b>Primer</b> | <b>Location<sup>a</sup></b> | <b>Sequence (5'-3')</b>   |
|---------------|-----------------------------|---------------------------|
| 21F           | 20078-20101                 | CCTTATACCTGTCAGATAAGTTTG  |
| 21R           | 21232-21255                 | GTTTCGTAAACATATTGCATAGCAC |
| 22F           | 21072-21094                 | CTATTTAACAAAGCCATCCCAGC   |
| 22R           | 22260-22284                 | GTGAAATGGTAAATTGTCTAGTGTC |
| 23F           | 22034-22054                 | CCAACCTCAAGTGTTCCTCAGGT   |
| 23R           | 23249-23269                 | GAAACACCCAGCACATTAGTA     |
| 24F           | 23103-23123                 | TACACTGCAGCATGTAAGACC     |
| 24R           | 24255-24275                 | AACGGTAGGTTTTCTAGGTTC     |
| 25F           | 24044-24064                 | CATTTTCTCTCTGGTACAGGC     |
| 25R           | 25287-25308                 | CCCACGTATAGCTAGATAACAAG   |
| 26F           | 25124-25144                 | TGGCGCTATAAAAATGCGCTC     |
| 26R           | 26288-26310                 | GATTACTCACAGCTGAGTAGTCG   |
| 27F           | 26104-26124                 | CACTCCTTAGTGGTACATTGC     |
| 27R           | 27266-27288                 | GCATCTCCAAAATTTTGAAGCC    |
| 28F           | 27053-27074                 | GCCCTTAAATCTTTGGGTATTG    |
| 28R           | 28006-28028                 | GTGTATCCATATCAACACCGTCA   |

<sup>a</sup> Location corresponds to position within the genome of PEDV YN150.
